# Supplementary material
Source: PubMed Central journal article supplement (PMC3987670)
Supplement: NIHMS558954-supplement-01.pdf [file NIHMS558954-supplement-01.pdf]

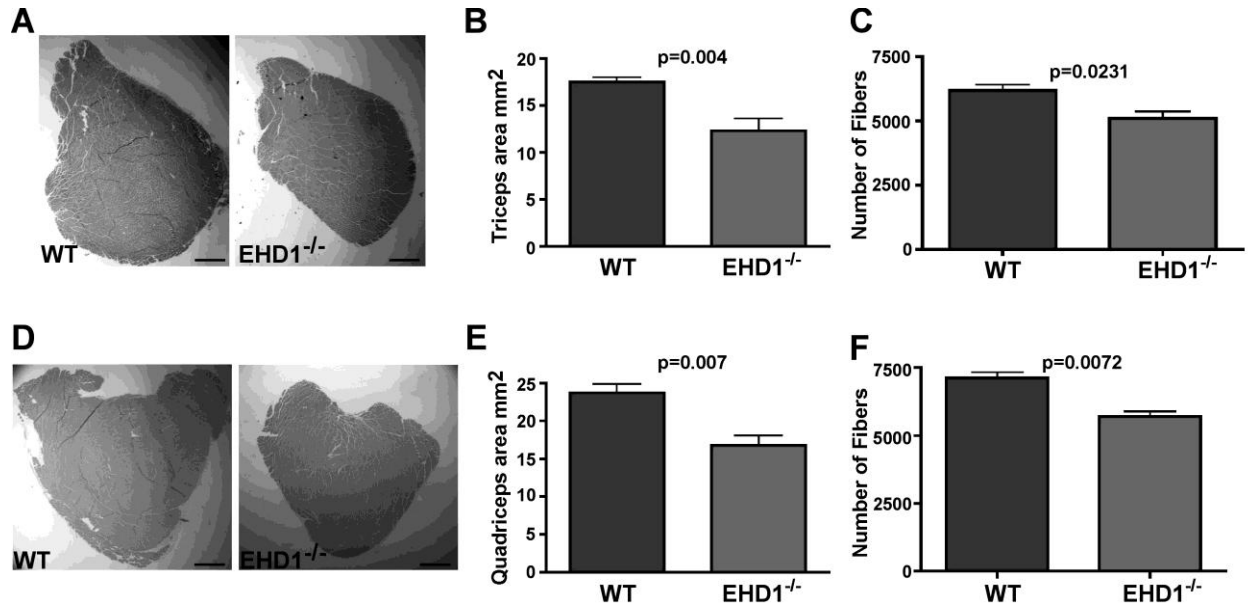

**Supplemental Figure 1.** Reduced muscle area and decreased fiber number in EHD1-null muscle. A & D) Cross sectional analysis of H&E-stained triceps and quadriceps muscles from wildtype and EHD1-null mice. Sections were taken at the midbelly of the muscle. EHD1-null muscles are visibly smaller in size. Scale 1mm. B & E) EHD1-null triceps and quadriceps muscles are significantly smaller in area than wildtype littermates ( $n>4$ ,  $p=0.004$  and  $p=0.007$ , respectively). C & F) EHD1-null triceps and quadriceps muscles have significantly fewer myofibers than wildtype littermates ( $p=0.0231$  and  $p=0.007$ , respectively.)
